# Supplementary material
Source: HighWire-hosted journal article supplement (https://jnis.bmj.com/highwire/filestream/167248/field_highwire_adjunct_files/0/neurintsurg-2021-017471supp001_data_supplement.pdf)
Supplement: neurintsurg-2021-017471supp001_data_supplement.pdf [file neurintsurg-2021-017471supp001_data_supplement.pdf]

## SUPPLEMENTARY MATERIAL

**Supplementary Figure 1:** Images shown in the M2/3 occlusion case-scenarios. Multiphase CTA with right MeVO (medium vessel occlusion) - M2/M3 MCA (pink arrowheads). Delayed washout in the third phase (III). Accompanying case descriptions:

1A) 86-year-old male, otherwise healthy, NIHSS 9 with left-sided weakness, facial palsy, and hemineglect. Onset-to-CT time 2 hours 10 minutes. ASPECTS 9, core (CBF <30%) volume is 7 ml. Patient received tPA 10 minutes ago.

1B) 86-year-old male, otherwise healthy, NIHSS 9 with left-sided hemiplegia and facial palsy. Onset-to-CT time 2 hours 10 minutes. ASPECTS 10, core (CBF <30%) volume is 7 ml. Patient is not eligible for tPA.

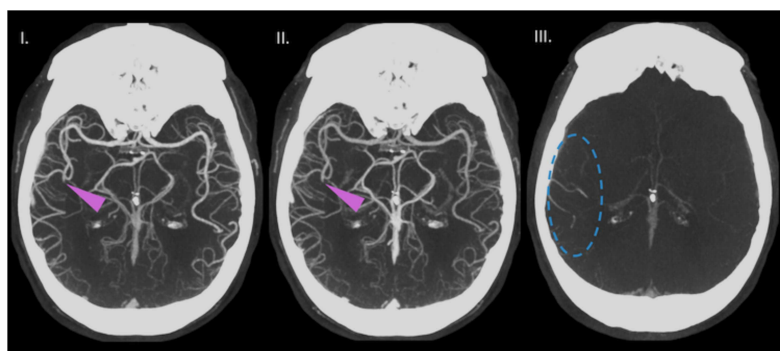

**Supplementary Figure 2:** Images shown in the A3 occlusion case-scenarios. Right MeVO - A3 ACA (pink arrowhead). Red line on the sagittal projection represents the course of the missing artery. Turquoise line represents the course of the terminal ICA and the ACA origin. Accompanying case descriptions:

2A) 79-year-old male, otherwise healthy, NIHSS 8 with left leg and arm weakness, left-sided sensory loss and left facial palsy. Onset-to-CT time 2 hours 15 minutes. Core (CBF <30%) volume is 9 ml, penumbra (Tmax >6s) 30 ml. Patient received tPA.

2B) 79-year-old male, otherwise healthy, NIHSS 8 with left leg and arm weakness, left-sided sensory loss and left facial palsy. Onset-to-CT time 2 hours 15 minutes. Core (CBF <30%) volume is 9 ml, penumbra (Tmax >6s) 30 ml. Patient is not eligible for tPA.

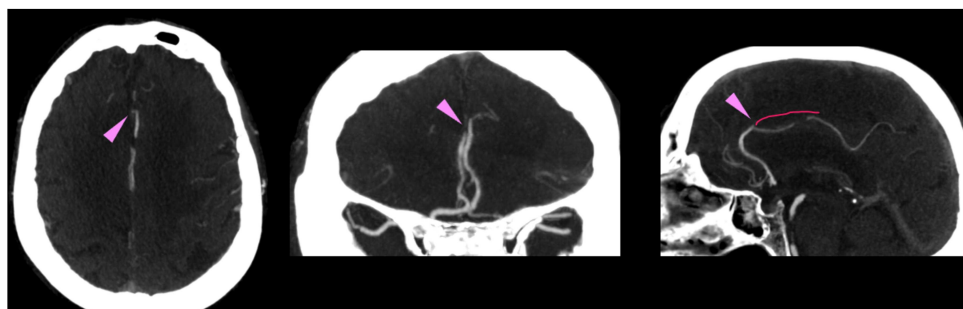

**Supplementary Figure 3:** Images shown in the P2/3 occlusion case-scenarios. CTA shows a right MeVO - P2/P3 PCA. Accompanying case descriptions:

**3A)** 52-year-old male, truck driver, NIHSS 8 with mild left-sided weakness, left homonymous hemianopia, confusion, not following commands. Onset-to-CT time 1 hour 30 minutes. Core (CBF <30%) volume is 4 ml, penumbra (Tmax >6s) 24ml. Patient received tPA 10 minutes ago.

**3B)** 52-year-old male, truck driver, NIHSS 3 with mild left arm weakness and left homonymous hemianopia. Onset-to-CT time 1 hour 30 minutes. Core (CBF <30%) volume is 4 ml, penumbra (Tmax >6s) 24ml. Patient is not eligible for tPA.

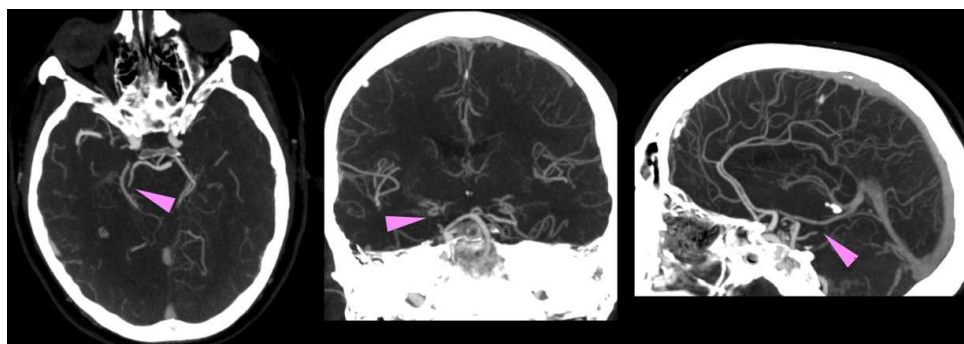

**Supplementary Table 1:** Demographics of physicians (N=366) participating in the survey. *IQR, interquartile range; EVT, endovascular treatment.*

| Physician demographics (N=366)                               | Value      |
|--------------------------------------------------------------|------------|
| Specialty – <i>n</i> (%)                                     |            |
| Interventional Neuroradiologist                              | 170 (46.5) |
| Interventional Radiologists                                  | 18 (4.9)   |
| Interventional Neurologist                                   | 36 (9.8)   |
| Neurologist                                                  | 97 (26.5)  |
| Neurosurgeons                                                | 39 (10.7)  |
| Geographic region – <i>n</i> (%)                             |            |
| North America                                                | 95 (26.2)  |
| Europe                                                       | 179 (49.5) |
| Asia & Pacific & Africa                                      | 75 (20.7)  |
| South America                                                | 13 (3.6)   |
| Hospital Setting – <i>n</i> (%)                              |            |
| Teaching                                                     | 337 (92.1) |
| Non-teaching                                                 | 29 (7.9)   |
| Physician gender – <i>n</i> (%)                              |            |
| Female                                                       | 56 (15.3)  |
| Male                                                         | 308 (84.1) |
| Do not wish to declare                                       | 2 (0.6)    |
| Age – <i>n</i> (%)                                           |            |
| Under 30 years                                               | 5 (1.4)    |
| 31 – 40 years                                                | 96 (26.2)  |
| 41 – 50 years                                                | 151 (41.3) |
| 51 – 60 years                                                | 80 (21.9)  |
| Over 60 years                                                | 34 (8.3)   |
| Experience in vascular neuro-interventions – <i>n</i> (%)    |            |
| 0 - 5 years                                                  | 51 (13.9)  |
| 5 -10 years                                                  | 81 (22.1)  |
| 10 – 15 years                                                | 77 (21.0)  |
| 15 – 20 years                                                | 53 (14.5)  |
| More than 20 years                                           | 52 (14.2)  |
| Not applicable                                               | 52 (14.2)  |
| Range of annual center thrombectomy volume – <i>median</i>   | 100-200    |
| Range of annual personal thrombectomy volume – <i>median</i> | 10-50      |
| Number of interventionalists – <i>median (IQR)</i>           | 3 (3-5)    |
| Availability of 24/7 coverage for EVT – <i>n</i> (%)         |            |
| Yes                                                          | 332 (90.7) |
| No                                                           | 34 (9.3)   |

**Supplementary Table 2:** Detailed country of practice of physicians (N=366) participating in the survey.

| Respondent country | Frequency (n=) | %             |
|--------------------|----------------|---------------|
| Armenia            | 1              | 0.27          |
| Australia          | 6              | 1.64          |
| Austria            | 1              | 0.27          |
| Belgium            | 7              | 1.91          |
| Brazil             | 8              | 2.19          |
| Canada             | 39             | 10.66         |
| China              | 10             | 2.73          |
| Colombia           | 1              | 0.27          |
| Croatia            | 1              | 0.27          |
| Czech Republic     | 5              | 1.37          |
| Denmark            | 8              | 2.19          |
| France             | 6              | 1.64          |
| Georgia            | 1              | 0.27          |
| Germany            | 34             | 9.29          |
| Greece             | 1              | 0.27          |
| India              | 15             | 4.10          |
| Iran               | 1              | 0.27          |
| Israel             | 1              | 0.27          |
| Italy              | 16             | 4.37          |
| Japan              | 11             | 3.01          |
| Kazakhstan         | 1              | 0.27          |
| Kuwait             | 1              | 0.27          |
| Latvia             | 1              | 0.27          |
| Mexico             | 3              | 0.82          |
| Netherlands        | 16             | 4.37          |
| New Zealand        | 3              | 0.82          |
| Norway             | 7              | 1.91          |
| Pakistan           | 1              | 0.27          |
| Peru               | 1              | 0.27          |
| Poland             | 4              | 1.09          |
| Portugal           | 7              | 1.91          |
| Republic of Korea  | 24             | 6.56          |
| Romania            | 2              | 0.55          |
| Russian Federation | 7              | 1.91          |
| Serbia             | 2              | 0.55          |
| Slovakia           | 1              | 0.27          |
| South Africa       | 2              | 0.55          |
| Spain              | 22             | 6.01          |
| Sweden             | 2              | 0.55          |
| Switzerland        | 12             | 3.28          |
| Turkey             | 3              | 0.82          |
| United Kingdom     | 11             | 3.01          |
| USA                | 56             | 15.30         |
| Vietnam            | 4              | 1.09          |
| <b>Total</b>       | <b>366</b>     | <b>100.00</b> |
